# Supplementary material for: Solution-processed copper(i) iodide via co-doping for enhanced hole selective contacts in p-type crystalline silicon solar cells
Source: Royal Society of Chemistry journal article supplement (doi:10.1039/d3tc02988c), 2023-12-13
Supplement: d3tc02988c1.pdf [file d3tc02988c1.pdf]

## Supporting Information

### **Solution-Processed Copper (I) Iodide via Co-Doping for Enhanced Hole Selective Contacts in P-Type Crystalline Silicon Solar Cells**

Wang Fu<sup>1</sup>, Wuqi Liu<sup>1</sup>, Yaju Wei<sup>1</sup>, Dan Liu<sup>1</sup>, Songyu Li<sup>1</sup>, Di Zhao<sup>1</sup>, Xiaoping Wu<sup>1</sup>,  
Lingbo Xu<sup>1</sup>, Ping Lin<sup>1</sup>, Can Cui<sup>1\*</sup>, Xuegong Yu<sup>2</sup>, Peng Wang<sup>1\*</sup>

<sup>1</sup>Key Laboratory of Optical Field Manipulation of Zhejiang Province, Department of Physics, Zhejiang Sci-Tech University, Hangzhou 310018, China

<sup>2</sup>State Key Laboratory of Silicon and Advanced Semiconductor Materials & School of Material Science and Engineering, Zhejiang University, Hangzhou 310027, China

Corresponding author: \*pengwang@zstu.edu.cn (Peng Wang), cancui@zstu.edu.cn  
(Can Cui)

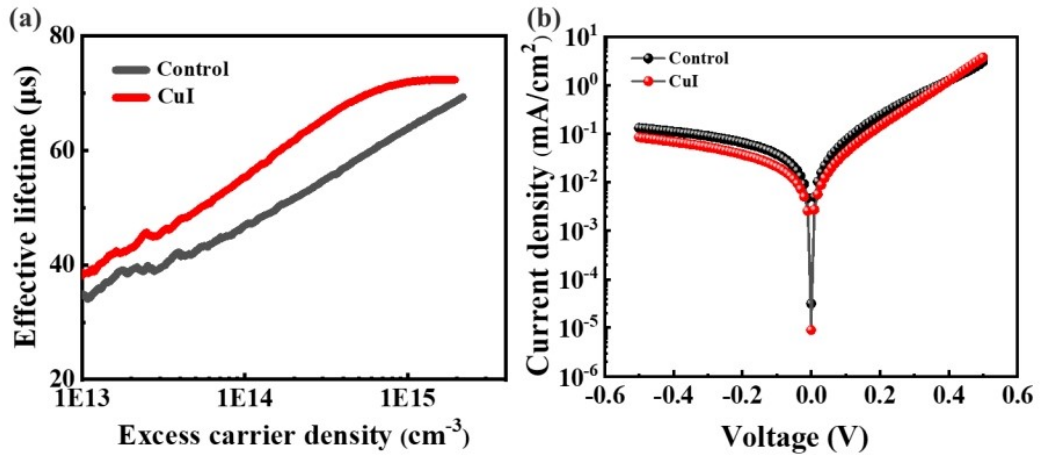

**Figure S1.** (a) Effective carrier lifetime of p-Si wafers without (the control) and with CuI films. (b) Dark J-V curves of the control and CuI/p-Si heterojunction solar cell devices.

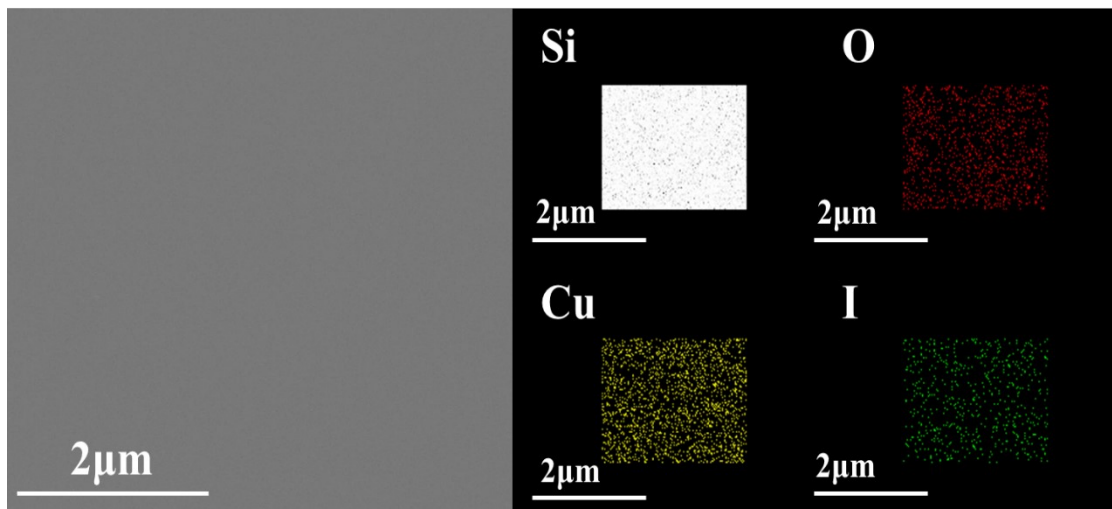

**Figure S2.** SEM image and element distribution of  $\text{I}_2:\text{CuI}$  film.

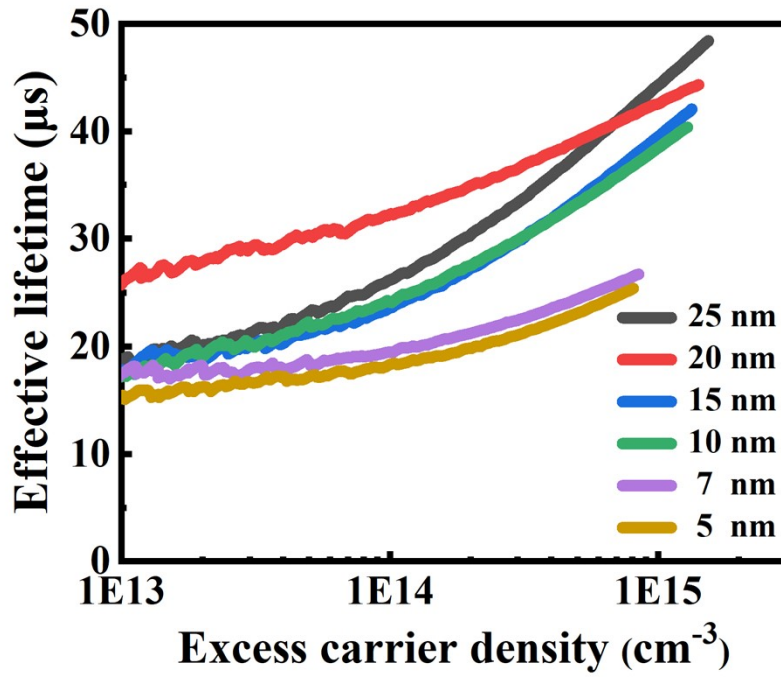

**Figure S3.** Effective carrier lifetime of p-Si wafers coated by I<sub>2</sub>:CuI films with different thickness.

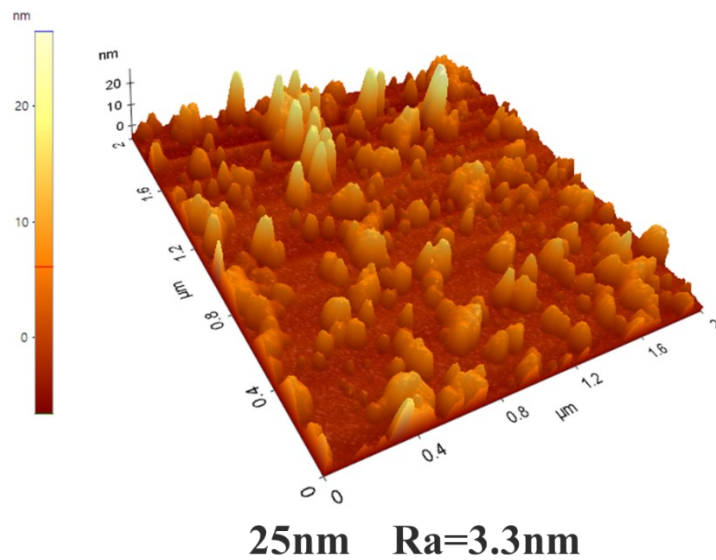

**Figure S4.** AFM image of I<sub>2</sub>:CuI film with the thickness of 25 nm.

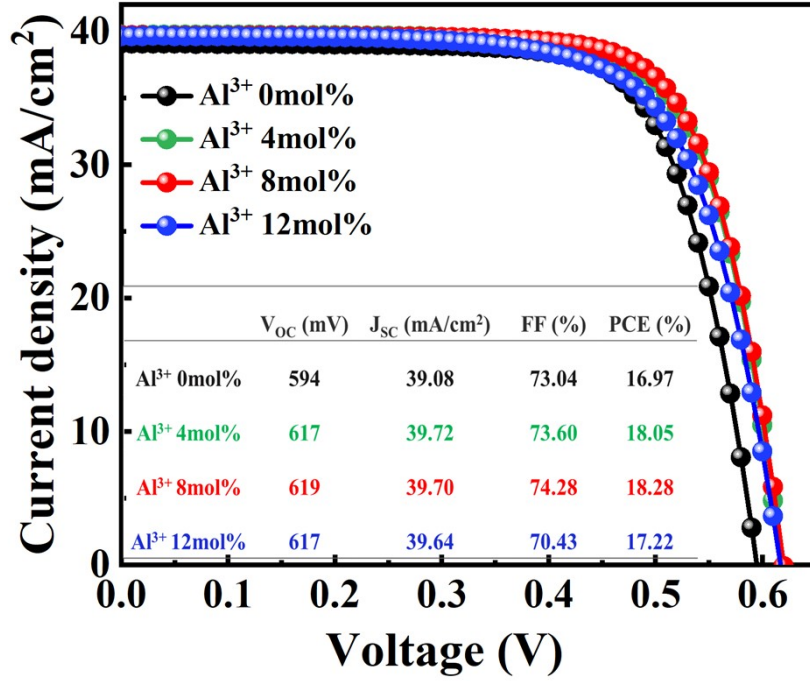

**Figure S5.** Illuminated J-V curves of  $Al^{3+}$ - $I_2$ :CuI/p-Si heterojunction solar cell devices with different  $Al^{3+}$  doping concentrations.

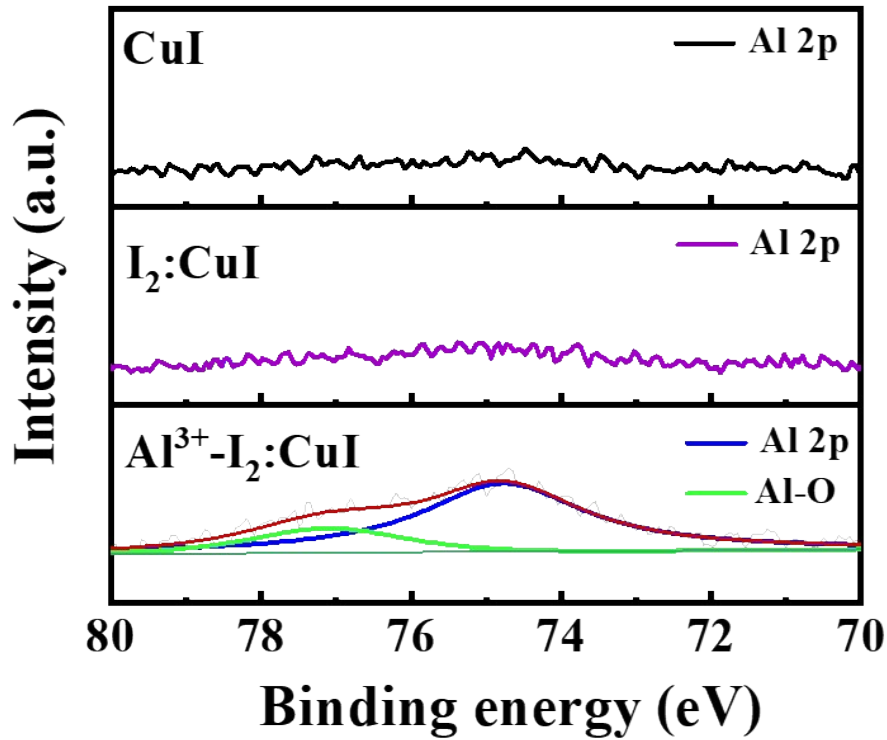

**Figure S6.** Al 2p XPS spectra of pristine CuI,  $I_2$ :CuI and  $Al^{3+}$ - $I_2$ :CuI films.

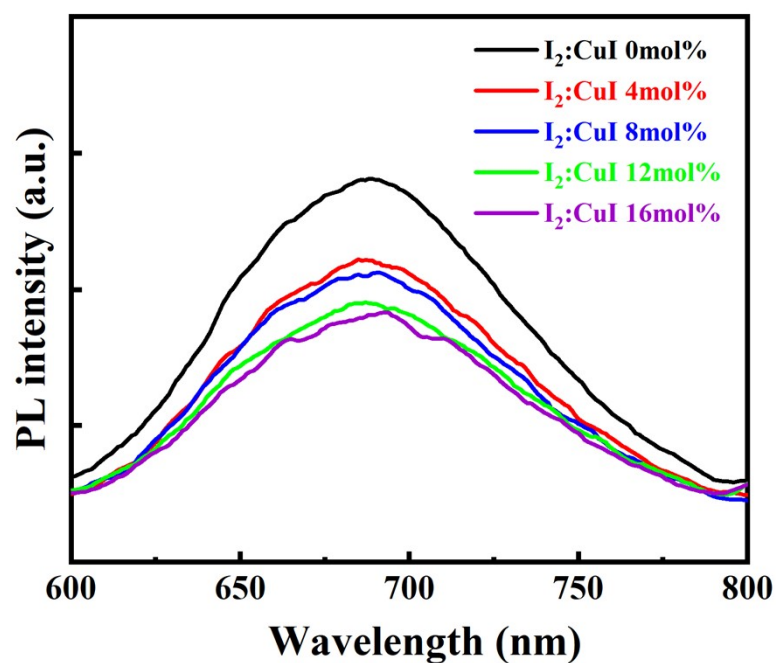

**Figure S7.** Steady-state PL spectra of CuI films with different I<sub>2</sub> doping concentrations.

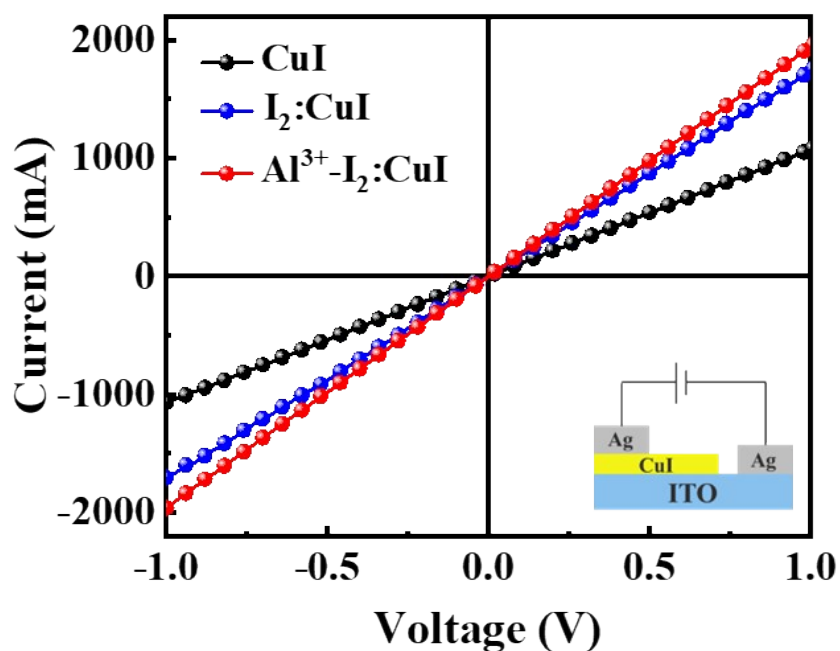

**Figure S8.** The conductivity measurement of pristine CuI, I<sub>2</sub>:CuI and Al<sup>3+</sup>-I<sub>2</sub>:CuI films.

The inset shows the test structure.

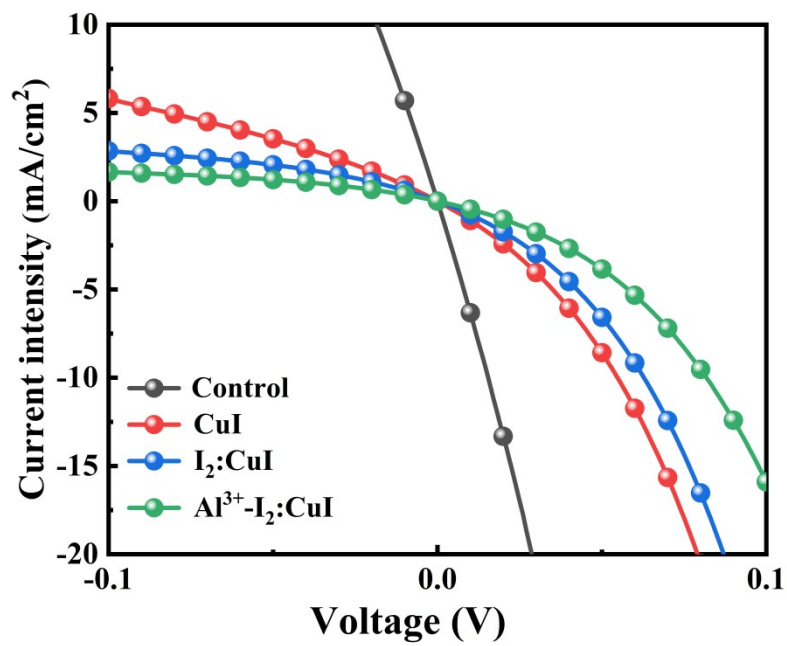

**Figure S9.** Dark J-V curves of the carrier transport layers on n-Si substrates. The inset shows the contact structure.

**Table S1.** Photovoltaic parameters of I<sub>2</sub>:CuI/p-Si heterojunction solar cells with different I<sub>2</sub> doping concentrations.

| I <sub>2</sub> :CuI | V <sub>OC</sub> (mV) | J <sub>SC</sub> (mA/cm <sup>2</sup> ) | FF (%) | PCE (%) |
|---------------------|----------------------|---------------------------------------|--------|---------|
| 0%                  | 584                  | 39.82                                 | 61.92  | 14.41   |
| 4%                  | 576                  | 39.76                                 | 68.40  | 15.68   |
| 8%                  | 576                  | 39.86                                 | 71.94  | 16.54   |
| 12%                 | 569                  | 39.71                                 | 70.63  | 15.96   |
| 16%                 | 562                  | 39.55                                 | 67.1   | 14.93   |

**Table S2.** Photovoltaic parameters of I<sub>2</sub>:CuI/p-Si heterojunction solar cells with different thickness of CuI films.

| Thickness | V <sub>OC</sub> (mV) | J <sub>SC</sub> (mA/cm <sup>2</sup> ) | FF (%) | PCE (%) |
|-----------|----------------------|---------------------------------------|--------|---------|
| 5 nm      | 546                  | 39.73                                 | 70.17  | 15.23   |
| 7 nm      | 580                  | 39.44                                 | 71.85  | 16.46   |
| 10 nm     | 594                  | 39.60                                 | 73.77  | 17.37   |
| 15 nm     | 594                  | 39.38                                 | 71.28  | 16.67   |
| 20 nm     | 591                  | 39.52                                 | 67.50  | 15.77   |
| 25 nm     | 592                  | 39.37                                 | 66.63  | 15.53   |

**Table S3.** Parameters of pristine CuI, I<sub>2</sub>:CuI and Al<sup>3+</sup>-I<sub>2</sub>:CuI films measured by Hall effect.

|                                       | Carrier concentration<br>(cm <sup>-3</sup> ) | Mobility<br>(cm <sup>2</sup> V <sup>-1</sup> s <sup>-1</sup> ) | Conductivity (S cm <sup>-1</sup> ) |
|---------------------------------------|----------------------------------------------|----------------------------------------------------------------|------------------------------------|
| CuI                                   | 2.52 × 10 <sup>18</sup>                      | 52.9                                                           | 21.33                              |
| I <sub>2</sub> :CuI                   | 4.64 × 10 <sup>18</sup>                      | 34.1                                                           | 25.32                              |
| Al <sup>3+</sup> -I <sub>2</sub> :CuI | 3.77 × 10 <sup>19</sup>                      | 28.3                                                           | 170.70                             |

**Table S4.** Simulation parameters of the CuI/p-Si heterojunction solar cells at 300 K.

| Parameters                                           | p-Si                     | CuI <sup>1</sup>       | I <sub>2</sub> :CuI    | Al <sup>3+</sup> -I <sub>2</sub> :CuI |
|------------------------------------------------------|--------------------------|------------------------|------------------------|---------------------------------------|
| Thickness(cm)                                        | 1.75 × 10 <sup>-2</sup>  | 1 × 10 <sup>-6</sup>   | 1 × 10 <sup>-6</sup>   | 1 × 10 <sup>-6</sup>                  |
| Shallow uniform acceptor density (cm <sup>-3</sup> ) | 1 × 10 <sup>16</sup>     | 1 × 10 <sup>19</sup>   | 1.5 × 10 <sup>19</sup> | 2.0 × 10 <sup>19</sup>                |
| Dielectric constant                                  | 11.9                     | 6.5                    | 6.5                    | 6.5                                   |
| Electron affinity (eV)                               | 4.05                     | 2.35                   | 2.35                   | 2.35                                  |
| Bandgap (eV)                                         | 1.124                    | 2.9                    | 2.97                   | 2.93                                  |
| CB effective density of states (cm <sup>-3</sup> )   | 2.843 × 10 <sup>19</sup> | 2.2 × 10 <sup>18</sup> | 2.2 × 10 <sup>18</sup> | 2.2 × 10 <sup>18</sup>                |
| VB effective density of states (cm <sup>-3</sup> )   | 2.682 × 10 <sup>19</sup> | 1.8 × 10 <sup>18</sup> | 1.8 × 10 <sup>18</sup> | 1.8 × 10 <sup>18</sup>                |
| Electron mobility (cm <sup>2</sup> /Vs)              | 1107                     | 100                    | 100                    | 100                                   |
| Hole mobility (cm <sup>2</sup> /Vs)                  | 424.6                    | 43.9                   | 43.9                   | 43.9                                  |

1 J. Hossain, M. Rahman, M. M. A. Moon, B. K. Mondal, M. F. Rahman and M. H. K.

Rubel, *Eng. Res. Express*, 2020, **2**, 045019.
